# Supplementary material for: Functional characterization of MLH1 missense variants unveils mechanisms of pathogenicity and clarifies role in cancer
Source: PubMed Central journal article supplement (PMC9714755; doi:10.1371/journal.pone.0278283), 2022-12-01
Supplement: pone.0278283.s002.pdf [file pone.0278283.s002.pdf]

## S1 Table: Summary of previous functional measurements and current InSiGHT classifications

The table lists functional results of previously performed MLH1 variant measurements, sorted by stability (expression of WT in %). All variants with **stability measurements** lower than the clinical stability reference variant for pathogenicity p.(Ala681Thr) are indicated with **red colour**, those with expression higher than the neutral stability reference variant p.(V716M) are indicated by **green colour**. For **MMR activity** measurements, activity close to WT (>75%) was considered **proficient**, activity close to negative control (<25%) was considered **deficient**. Functional result summary can be compared to current variant classifications of the InSiGHT (retrieved October 2022).

| Variant | Results functional analysis in Hinrichsen <i>et al.</i> (2013) <sup>1</sup> |                                 |                                            | Classification InSiGHT (10/2022) <sup>2</sup> |                   |
|---------|-----------------------------------------------------------------------------|---------------------------------|--------------------------------------------|-----------------------------------------------|-------------------|
|         | Expression % of WT                                                          | MMR activity % of WT            | Functional result summary                  | Class                                         | Class in words    |
|         | >V716M=proficient<br><A681T=deficient                                       | >75=proficient<br><25=deficient |                                            |                                               |                   |
| WT      | 100                                                                         | 100                             | proficient (MMR and stability)             |                                               |                   |
| I219V   | 94                                                                          | 97                              | proficient (MMR and stability)             | 1                                             | not pathogenic    |
| R265H   | 91                                                                          | 91                              | proficient (MMR and stability)             | -                                             | no classification |
| L749P   | 85                                                                          | 15                              | MMR deficient                              | 5                                             | pathogenic        |
| E663G   | 85                                                                          | 95                              | proficient (MMR and stability)             | -                                             | no classification |
| D601G   | 82                                                                          | 96                              | proficient (MMR and stability)             | 3                                             | uncertain         |
| K618A   | 78                                                                          | 92                              | proficient (MMR and stability)             | 1                                             | not pathogenic    |
| K84E    | 76                                                                          | 9                               | MMR deficient                              | 4                                             | likely pathogenic |
| H718Y   | 73                                                                          | 110                             | proficient (MMR and stability)             | 1                                             | not pathogenic    |
| R755W   | 72                                                                          | 10                              | MMR deficient                              | 3                                             | uncertain         |
| E578G   | 71                                                                          | 91                              | proficient (MMR and stability)             | 1                                             | not pathogenic    |
| H109Q   | 71                                                                          | 71                              | unclear (MMR)                              | 3                                             | uncertain         |
| V716M   | 64                                                                          | 88                              | STABILITY REFERENCE VARIANT 1 <sup>5</sup> | 1                                             | not pathogenic    |
| R522W   | 62                                                                          | 105                             | unclear                                    | -                                             | no classification |
| R659Q   | 61                                                                          | 85                              | unclear                                    | 3                                             | uncertain         |
| V506A   | 58                                                                          | 88                              | unclear                                    | 3                                             | uncertain         |
| N551T   | 53                                                                          | 80                              | unclear                                    | 3                                             | uncertain         |
| G54E    | 52                                                                          | 44                              | unclear                                    | -                                             | no classification |
| A681T   | 52                                                                          | 99                              | STABILITY REFERENCE VARIANT 2 <sup>5</sup> | 5                                             | pathogenic        |
| A586P   | 50                                                                          | 21                              | Stability and MMR deficient                | 3                                             | uncertain         |
| L559R   | 45                                                                          | 79                              | Stability deficient                        | 3                                             | uncertain         |
| T117M   | 44                                                                          | 5                               | Stability and MMR deficient                | 5                                             | pathogenic        |
| L622H   | 42                                                                          | 80                              | Stability deficient                        | 5                                             | pathogenic        |
| T82I    | 41                                                                          | 6                               | Stability and MMR deficient                | 5                                             | pathogenic        |
| P640S   | 30                                                                          | 80                              | Stability deficient                        | 4                                             | likely pathogenic |
| R659L   | 28                                                                          | 8                               | Stability and MMR deficient                | -                                             | no classification |
| L574P   | 27                                                                          | 16                              | Stability and MMR deficient                | 4                                             | likely pathogenic |
| R725C   | 26                                                                          | 101                             | Stability deficient                        | 3                                             | uncertain         |
| P654L   | 25                                                                          | 67                              | Stability deficient                        | 5                                             | pathogenic        |
| L676R   | 24                                                                          | 12                              | Stability and MMR deficient                | 3                                             | uncertain         |
| P648L   | 22                                                                          | 92                              | Stability deficient                        | 4                                             | likely pathogenic |
| T662P   | 22                                                                          | 93                              | Stability deficient                        | -                                             | no classification |
| D41G    | 20                                                                          | 10                              | Stability and MMR deficient                | 5                                             | pathogenic        |
| G65D    | 17                                                                          | 19                              | Stability and MMR deficient                | 4                                             | likely pathogenic |
| G101D   | 16                                                                          | 11                              | Stability and MMR deficient                | 4                                             | likely pathogenic |
| N38H    | 14                                                                          | 15                              | Stability and MMR deficient                | 5                                             | pathogenic        |
| R659P   | 13                                                                          | 99                              | Stability deficient                        | 5                                             | pathogenic        |
| L653R   | 11                                                                          | 5                               | Stability and MMR deficient                | 4                                             | likely pathogenic |
| E102K   | 2                                                                           | 27                              | Stability deficient                        | -                                             | no classification |

| Variant       | Results functional analysis in Hinrichsen <i>et al.</i> (2014) <sup>3</sup> |                                 |                                            | Classification InSiGHT (10/2022) <sup>2</sup> |                   |
|---------------|-----------------------------------------------------------------------------|---------------------------------|--------------------------------------------|-----------------------------------------------|-------------------|
|               | Expression % of WT                                                          | MMR activity % of WT            | Functional result summary                  | Class                                         | Class in words    |
|               | >V716M=proficient<br><A681T=deficient                                       | >75=proficient<br><25=deficient |                                            |                                               |                   |
| Q689R         | 106                                                                         | 99                              | proficient (MMR and stability)             | 1                                             | not pathogenic    |
| L507F         | 101                                                                         | 91                              | proficient (MMR and stability)             | -                                             | no classification |
| V716M         | 83                                                                          | -                               | STABILITY REFERENCE VARIANT 1 <sup>5</sup> | 1                                             | not pathogenic    |
| D41H          | 70                                                                          | 11                              | MMR deficient                              | 5                                             | pathogenic        |
| E605del       | 70                                                                          | 89                              | unclear                                    | -                                             | no classification |
| A681T         | 52                                                                          | -                               | STABILITY REFERENCE VARIANT 2 <sup>5</sup> | 5                                             | pathogenic        |
| E605del+V716M | 44                                                                          | 87                              | Stability deficient                        | -                                             | no classification |

| Variant | Results functional analysis in Köger <i>et al.</i> (2018) <sup>4</sup> |                                 |                                            | Classification InSiGHT (10/2022) <sup>2</sup> |                   |
|---------|------------------------------------------------------------------------|---------------------------------|--------------------------------------------|-----------------------------------------------|-------------------|
|         | Expression % of WT                                                     | MMR activity % of WT            | Functional result summary                  | Class                                         | Class in words    |
|         | >V716M=proficient<br><A681T=deficient                                  | >75=proficient<br><25=deficient |                                            |                                               |                   |
| N338S   | 130                                                                    | 95                              | proficient (MMR and stability)             | 3                                             | uncertain         |
| R575K   | 121                                                                    | 101                             | proficient (MMR and stability)             | -                                             | no classification |
| I500del | 105                                                                    | 104                             | proficient (MMR and stability)             | -                                             | no classification |
| H112Q   | 103                                                                    | 72                              | unclear (reduced MMR)                      | -                                             | no classification |
| P141A   | 92                                                                     | 111                             | proficient (MMR and stability)             | 3                                             | uncertain         |
| V716M   | 84                                                                     | -                               | STABILITY REFERENCE VARIANT 1 <sup>5</sup> | 1                                             | not pathogenic    |
| Y97D    | 81                                                                     | 27                              | unclear                                    | -                                             | no classification |
| A681T   | 61                                                                     | -                               | STABILITY REFERENCE VARIANT 2 <sup>5</sup> | 5                                             | pathogenic        |
| R265P   | 60                                                                     | 29                              | Stability deficient                        | 4                                             | likely pathogenic |
| L676P   | 41                                                                     | 49                              | Stability deficient                        | 3                                             | uncertain         |
| K616del | 40                                                                     | 35                              | Stability deficient                        | -                                             | no classification |

<sup>1</sup> Hinrichsen I, Brieger A, Trojan J, Zeuzem S, Nilbert M, Plotz G. Expression defect size among unclassified MLH1 variants determines pathogenicity in Lynch syndrome diagnosis. *Clin Cancer Res.* 2013; 19:2432–41. doi: 10.1158/1078-0432.CCR-12-3299 PMID: 23403630.

<sup>2</sup> MLH1 variant pathogenicity classifications performed by experts according to current guidelines in 5-tiered system, retrieved from <https://www.insight-database.org/classifications/> in October 2022.

<sup>3</sup> Hinrichsen I, Schäfer D, Langer D, Köger N, Wittmann M, Aretz S, et al. **Functional testing strategy for coding genetic variants of unclear significance in MLH1 in Lynch syndrome diagnosis.** *Carcinogenesis*. 2015; 36:202–11. doi: 10.1093/carcin/bgu239 PMID: 25477341.

<sup>4</sup> Köger N, Paulsen L, López-Kostner F, Della Valle A, Vaccaro CA, Palmero EI, et al. **Evaluation of MLH1 variants of unclear significance.** *Genes Chromosomes Cancer*. 2018; 57:350–8. doi: 10.1002/gcc.22536 PMID: 29520894.

<sup>5</sup> **MLH1 protein stability reference variants** were extensively established in reference <sup>1</sup>. **Stability reference variant 1 (V716M=p.(Val716Met))** represents a MLH1 polymorphism that displays reduced protein stability, but does not entail any effects on human health. It is therefore used to judge if a stability defect in an unclassified MLH1 variant is clinically neutral (when expression is higher than V716M). **Stability reference variant 2 (A681T=p.(Ala681Thr))** is a variant that displays WT MMR activity, but a protein stability stronger reduced than V716M. A681T is pathogenic, and carriers of the A681T variant have Lynch syndrome (although this variant has a lower penetrance). For these reasons, the variant is used as reference variant for protein stability defects that confer a pathogenic phenotype.
