# Supplementary material for: Functional characterization of MLH1 missense variants unveils mechanisms of pathogenicity and clarifies role in cancer
Source: PubMed Central journal article supplement (PMC9714755; doi:10.1371/journal.pone.0278283), 2022-12-01

Raw image of Figure 2A-panel 1  
(western blot detected with anti-MLH1)

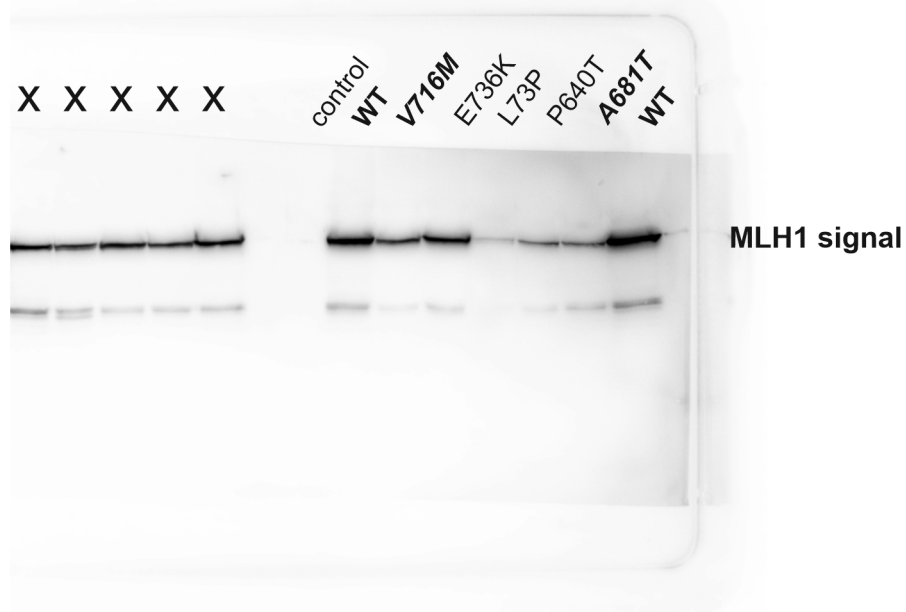

Raw image of Figure 2A-panel 2  
(western blot detected with anti-MLH1, -PMS2, -b-Actin)

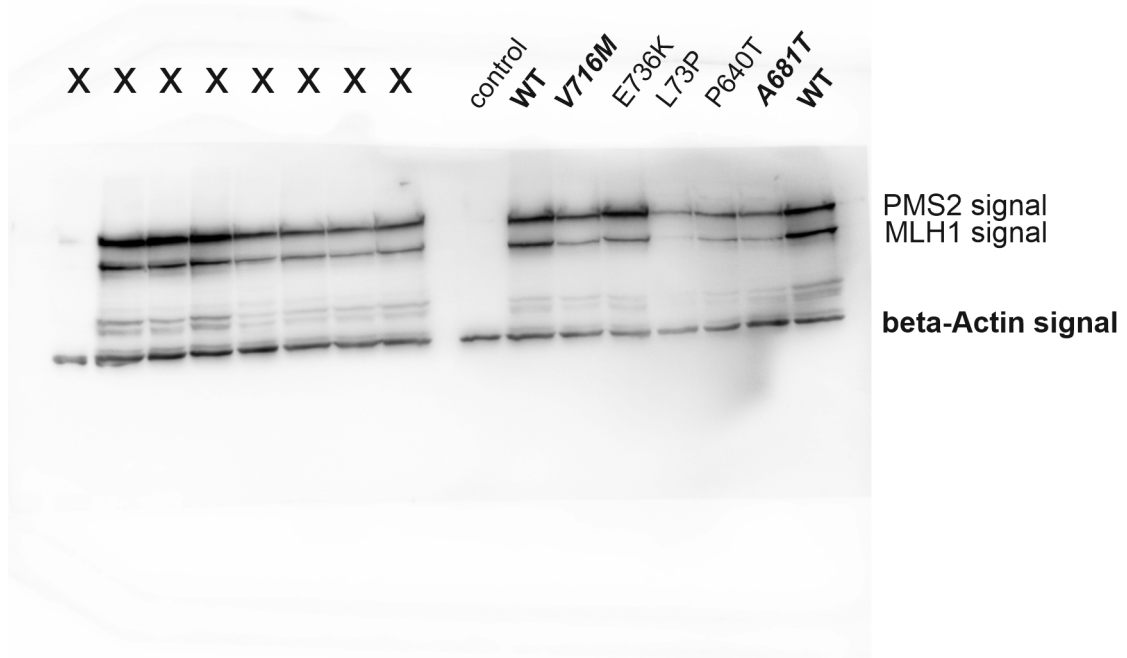

Raw image of Figure 3A (agarose gel)

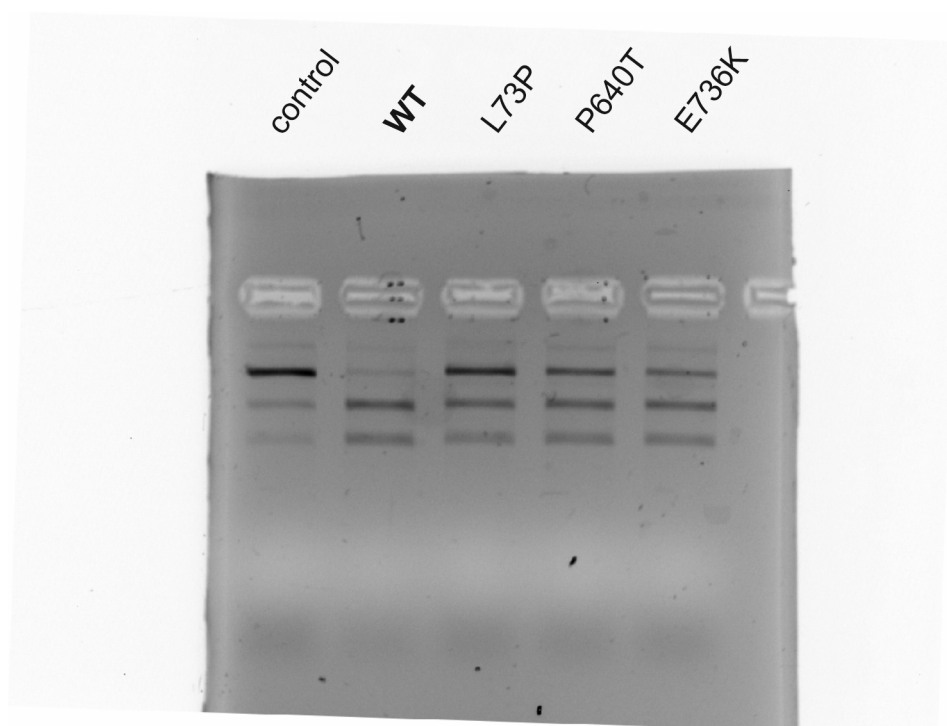

Supplement: pone.0278283.s003.pdf [file pone.0278283.s003.pdf]
